# Supplementary material
Source: PubMed Central journal article supplement (PMC2733819)
Supplement: ddp253_1.pdf [file ddp253_1.pdf]

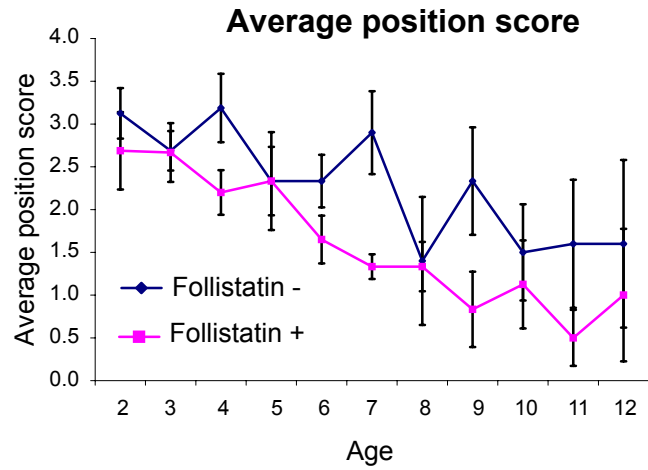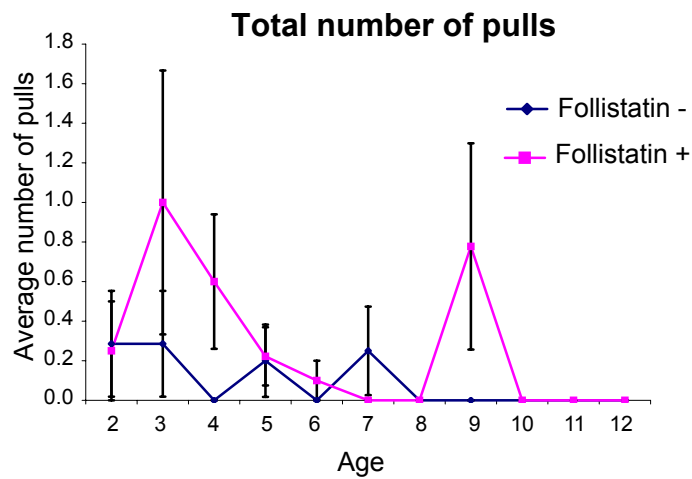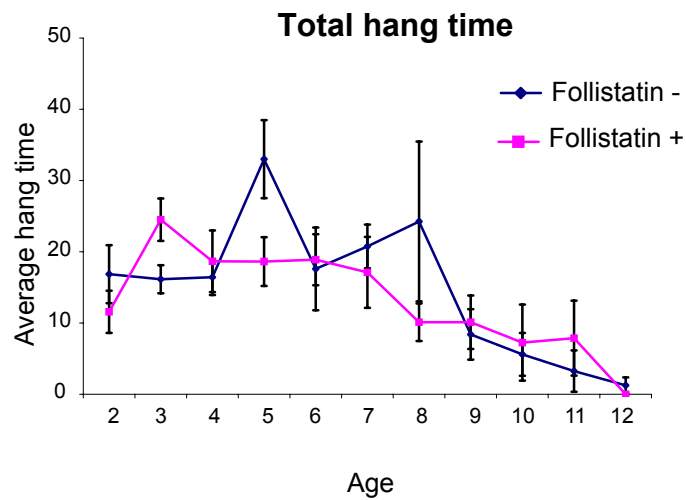

Supplemental Figure 1. Follistatin positive SMA mice show no significant improvement in tube test position scores, number of pulls, or hang time compared to follistatin negative SMA mice (n=8 per group).

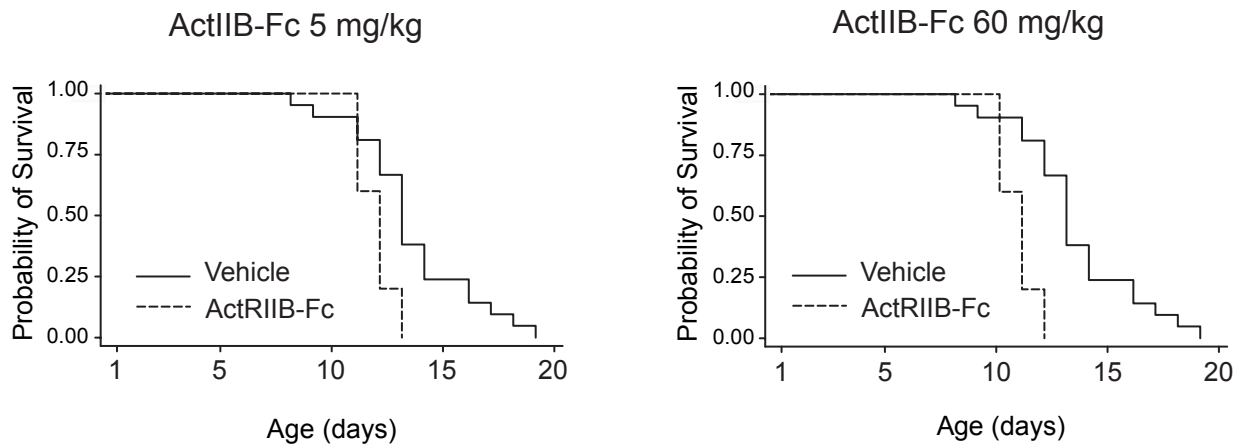

**Supplemental Figure 2.** ActRIIB-Fc at different doses does not extend survival of SMA mice. SMA mice were treated with ActRIIB-Fc at a dose of 5 mg/kg (n=5) or 60 mg/kg (n=5) and compared to vehicle-treated mice (n=21). ActRIIB-Fc-treated SMA mice showed mildly reduced survival: 5 mg/kg (Log rank p=0.046) and 60 mg/kg (Log rank p=0.002).
